# Supplementary material
Source: MDPI journal article supplement (https://www.mdpi.com/1424-2818/14/10/873)
Supplement: s1 [file s1]

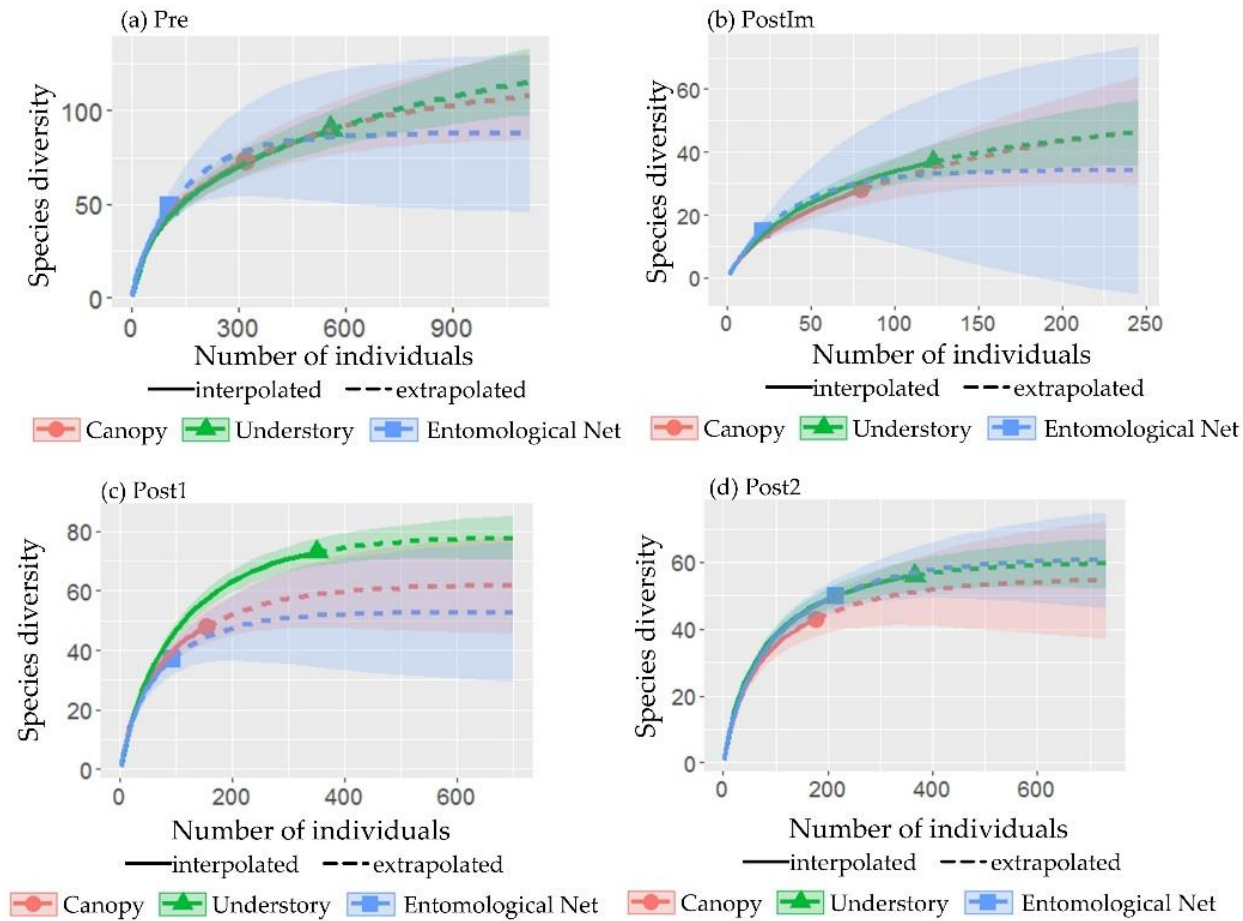

**Figure S1:** Sample-based rarefaction and extrapolation for combinations sampling techniques (Canopy, Understory and Entomological Net) and in each flood stage (Pre, PosIm, Pos1 e Pos2) since filling of the Santo Antônio dam on the Madeira River southwestern Brazilian Amazonia. With 95% unconditional confidence intervals (shaded area, bootstrap with 1,000 replications). Each of the curves is extrapolated up to the maximum sample size of the largest sample.

**Table S1:** Number of species and abundance of butterflies recorded before (Pre) and after (PostIm, Post1, Post2) the filling the Santo Antônio hydroelectric dam on the Madeira River, Western Amazonia, Brazil using three sampling techniques: canopy traps (C), understory traps (U) and entomological nets (N).

| Subfamily         | Specie                               | Pre |    |   | PostIm |   |   | Post1 |    |   | Post2 |    |   |
|-------------------|--------------------------------------|-----|----|---|--------|---|---|-------|----|---|-------|----|---|
|                   |                                      | C   | U  | N | C      | U | N | C     | U  | N | C     | U  | N |
| <b>Ageroniini</b> | <i>Batesia hypochlora hypoxantha</i> | 8   | 18 | 6 |        | 1 |   |       | 8  | 2 | 1     |    | 2 |
| <b>Apaturinae</b> | <i>Doxocopa agathina agathina</i>    | 1   |    |   |        |   |   |       |    |   |       |    |   |
| <b>Biblidinae</b> | <i>Callicore cynosura cynosura</i>   | 4   |    |   |        |   |   | 2     |    |   | 3     |    |   |
| <b>Biblidinae</b> | <i>Callicore excelsior michaeli</i>  |     | 1  |   |        | 1 | 1 |       |    |   |       | 1  | 5 |
| <b>Biblidinae</b> | <i>Catonephele acontius acontius</i> | 16  | 13 | 1 | 10     | 7 |   | 10    | 13 | 2 | 29    | 29 | 4 |
| <b>Biblidinae</b> | <i>Catonephele antinoe</i>           | 1   |    |   |        |   |   |       |    |   |       |    |   |
| <b>Biblidinae</b> | <i>Catonephele numilia numilia</i>   | 12  | 4  | 1 | 1      | 1 | 1 | 5     |    |   | 1     | 12 |   |
| <b>Biblidinae</b> | <i>Catonephele salacia</i>           |     | 2  |   | 2      | 1 |   |       | 1  |   |       | 3  |   |
| <b>Biblidinae</b> | <i>Diaethria clymena clymena</i>     | 2   |    |   |        |   |   |       |    |   | 4     |    |   |
| <b>Biblidinae</b> | <i>Dynamine erchia</i>               |     |    | 1 |        |   |   |       | 1  |   |       |    |   |
| <b>Biblidinae</b> | <i>Ectima thecla lirina</i>          |     | 1  |   |        |   |   |       |    |   |       |    |   |
| <b>Biblidinae</b> | <i>Eunica eurota eurota</i>          | 1   |    |   |        |   |   |       |    |   |       |    |   |
| <b>Biblidinae</b> | <i>Eunica malvina malvina</i>        | 1   |    |   |        |   |   |       |    |   |       |    |   |
| <b>Biblidinae</b> | <i>Eunica marsolia marsolia</i>      | 2   |    |   |        |   |   | 1     | 3  |   | 4     |    |   |

|                   |                                        |    |    |   |    |    |   |   |    |   |    |    |   |
|-------------------|----------------------------------------|----|----|---|----|----|---|---|----|---|----|----|---|
| <b>Biblidinae</b> | <i>Eunica monima</i>                   | 9  | 3  | 3 |    |    |   |   |    |   |    | 1  |   |
| <b>Biblidinae</b> | <i>Eunica orphise</i>                  | 3  |    |   |    |    | 1 |   |    |   |    |    |   |
| <b>Biblidinae</b> | <i>Eunica sydonia caresa</i>           | 1  |    |   |    |    |   |   |    |   |    |    |   |
| <b>Biblidinae</b> | <i>Eunica viola</i>                    | 2  |    | 1 | 13 | 10 | 1 | 2 |    |   | 1  |    |   |
| <b>Biblidinae</b> | <i>Hamadryas arinome arinome</i>       | 4  | 1  |   |    | 3  |   | 3 | 6  |   | 3  | 1  |   |
| <b>Biblidinae</b> | <i>Hamadryas feronia farinulenta</i>   | 8  | 1  |   | 2  | 5  |   | 2 | 4  | 1 | 4  | 1  |   |
| <b>Biblidinae</b> | <i>Hamadryas glauconome glauconome</i> |    |    |   |    | 2  |   |   | 4  |   | 1  | 1  |   |
| <b>Biblidinae</b> | <i>Hamadryas laodamia laodamia</i>     | 7  | 1  |   |    | 1  |   | 1 | 3  | 1 |    | 1  |   |
| <b>Biblidinae</b> | <i>Nessaea hewitsonii</i>              | 1  | 2  | 2 |    | 2  |   |   |    |   | 7  | 2  |   |
| <b>Biblidinae</b> | <i>Nessaea obrinus lesoudieri</i>      |    | 5  | 1 |    |    |   | 6 | 5  |   | 4  | 6  |   |
| <b>Biblidinae</b> | <i>Pyrrhogyra amphiro amphiro</i>      | 2  | 4  |   |    |    |   |   | 1  |   | 3  |    |   |
| <b>Biblidinae</b> | <i>Pyrrhogyra crameri nautaca</i>      | 3  | 2  |   |    |    |   |   |    |   |    | 2  |   |
| <b>Biblidinae</b> | <i>Pyrrhogyra edocla cuparina</i>      |    | 4  | 3 |    |    |   |   | 3  |   | 4  |    |   |
| <b>Biblidinae</b> | <i>Temenis laothoe laothoe</i>         | 14 | 12 |   | 1  | 1  |   | 2 | 32 | 4 | 4  | 17 |   |
| <b>Biblidinae</b> | <i>Temenis pulchra pallidior</i>       |    |    | 1 |    |    |   | 1 |    |   |    | 1  |   |
| <b>Biblidinae</b> | <i>Vila emilia sinefascia</i>          |    |    |   |    |    |   |   |    |   |    | 1  |   |
| <b>Charaxinae</b> | <i>Agrias claudina sardanapalus</i>    | 2  | 1  |   |    |    |   |   |    |   |    |    |   |
| <b>Charaxinae</b> | <i>Archaeoprepona amphemachus</i>      |    | 1  |   | 1  |    |   |   |    |   |    |    |   |
| <b>Charaxinae</b> | <i>Archaeoprepona demophon</i>         | 11 | 7  |   | 4  | 2  |   | 8 | 1  | 3 | 10 | 4  | 1 |

|            |                                       |    |    |   |   |   |   |   |    |   |   |    |   |
|------------|---------------------------------------|----|----|---|---|---|---|---|----|---|---|----|---|
|            | demophon                              |    |    |   |   |   |   |   |    |   |   |    |   |
| Charaxinae | Archaeoprepona licomedes<br>licomedes | 1  |    |   | 2 |   |   | 1 | 1  |   | 2 | 6  |   |
| Charaxinae | Archaeoprepona meander meander        | 1  |    |   |   |   |   |   |    |   |   |    |   |
| Charaxinae | Consul fabius                         | 1  |    |   |   |   |   |   |    |   | 1 |    |   |
| Charaxinae | Fountainea ryphea ryphea              | 13 | 2  |   | 1 | 5 |   | 2 | 2  |   | 3 |    |   |
| Charaxinae | Hypna clytemnestra clytemnestra       | 5  | 11 |   | 3 | 6 | 1 | 3 | 2  |   | 3 | 6  | 1 |
| Charaxinae | Memphis acidalia acidalia             | 11 | 6  | 1 | 2 | 1 | 1 | 9 | 11 |   | 4 | 20 | 1 |
| Charaxinae | Memphis glauce                        |    | 2  |   |   |   |   |   | 1  | 1 |   |    |   |
| Charaxinae | Memphis leonida leonida               | 1  | 1  |   |   |   |   |   |    |   |   | 4  |   |
| Charaxinae | Memphis oenomais                      | 5  |    |   | 1 |   |   | 4 | 2  |   | 1 | 2  |   |
| Charaxinae | Memphis phantes vicinia               | 1  |    |   |   |   |   |   |    |   |   |    |   |
| Charaxinae | Memphis philumena philumena           | 1  |    |   |   |   |   |   |    |   |   |    |   |
| Charaxinae | Memphis polycarmes                    |    | 1  |   |   |   |   |   |    |   |   |    |   |
| Charaxinae | Prepona dexamenus dexamenus           | 1  | 1  |   |   |   |   |   | 1  |   |   | 3  |   |
| Charaxinae | Prepona eugenes                       |    |    |   |   | 1 |   |   |    |   |   |    |   |
| Charaxinae | Prepona laertes demodice              | 2  | 4  | 1 |   |   |   | 7 | 7  |   | 1 |    | 1 |
| Charaxinae | Prepona pheridamas                    | 1  | 5  |   |   |   |   |   | 9  |   | 6 |    |   |
| Charaxinae | Prepona pylene                        |    |    | 1 |   |   |   | 4 |    |   |   |    |   |

|                      |                                     |   |   |   |   |   |   |   |   |   |    |   |
|----------------------|-------------------------------------|---|---|---|---|---|---|---|---|---|----|---|
| <b>Charaxinae</b>    | <i>Zaretis isidora</i>              |   |   |   |   |   | 1 | 2 |   | 2 | 5  |   |
| <b>Charaxinae</b>    | <i>Zaretis itys itys</i>            | 2 | 4 |   | 1 | 1 | 1 | 2 |   | 1 | 12 |   |
| <b>Cyrestinae</b>    | <i>Marpesia chiron marius</i>       |   | 1 |   |   |   |   | 2 |   |   | 5  |   |
| <b>Cyrestinae</b>    | <i>Marpesia egina</i>               |   |   |   | 1 |   |   |   |   |   |    |   |
| <b>Cyrestinae</b>    | <i>Marpesia orsilochus</i>          |   | 1 | 2 |   |   |   |   |   |   | 2  |   |
| <b>Cyrestinae</b>    | <i>Marpesia themistocles norica</i> |   |   | 1 |   |   |   |   |   |   |    |   |
| <b>Limenitidinae</b> | <i>Adelpha attica attica</i>        |   |   |   |   |   |   |   | 3 | 5 | 6  |   |
| <b>Limenitidinae</b> | <i>Adelpha capucinus capucinus</i>  | 1 |   | 2 |   |   |   |   | 2 |   |    |   |
| <b>Limenitidinae</b> | <i>Adelpha heraclea heraclea</i>    |   |   | 1 |   |   |   | 4 | 2 |   | 3  |   |
| <b>Limenitidinae</b> | <i>Adelpha iphicleora gortyna</i>   |   |   | 2 |   |   | 3 | 3 |   |   |    |   |
| <b>Limenitidinae</b> | <i>Adelpha malea aethalia</i>       | 1 | 1 | 3 |   | 1 | 1 | 7 | 4 | 2 | 4  | 9 |
| <b>Limenitidinae</b> | <i>Adelpha melona leucocoma</i>     |   | 1 |   |   |   |   |   |   |   |    |   |
| <b>Limenitidinae</b> | <i>Adelpha mesentina</i>            | 1 |   |   |   |   |   |   |   | 3 |    | 1 |
| <b>Limenitidinae</b> | <i>Adelpha plesaura phliassa</i>    | 1 |   | 1 |   |   |   |   |   | 2 |    |   |



|           |                                      |   |    |   |   |   |   |   |   |   |    |   |
|-----------|--------------------------------------|---|----|---|---|---|---|---|---|---|----|---|
| Satyrinae | <i>Caligo teucer teucer</i>          | 1 | 1  |   |   |   |   |   |   | 2 | 4  |   |
| Satyrinae | <i>Catoblepia berecynthia</i>        | 2 | 1  |   | 1 | 2 |   |   |   | 2 | 2  | 3 |
| Satyrinae | <i>Catoblepia soranus</i>            | 2 | 14 | 1 |   | 1 |   |   | 2 | 3 | 5  |   |
| Satyrinae | <i>Catoblepia xanthus</i>            |   | 3  |   |   |   |   |   |   |   | 1  |   |
| Satyrinae | <i>Chloreuptychia agatha</i>         | 1 | 1  |   |   |   |   |   |   |   |    |   |
| Satyrinae | <i>Chloreuptychia arnaca</i>         |   |    | 1 |   |   |   | 1 |   |   |    |   |
| Satyrinae | <i>Chloreuptychia chlorimene</i>     |   | 1  | 2 |   |   |   |   |   |   |    | 2 |
| Satyrinae | <i>Chloreuptychia herseis</i>        |   | 9  | 2 | 1 | 2 |   | 5 | 3 | 1 |    | 6 |
| Satyrinae | <i>Chloreuptychia hewitsonii</i>     |   | 2  |   |   |   |   | 2 |   |   | 1  |   |
| Satyrinae | <i>Choreuptychia sp.1</i>            |   |    |   | 1 | 1 |   |   |   |   |    |   |
| Satyrinae | <i>Cissia penelope</i>               | 1 | 3  |   | 1 | 1 | 1 |   |   | 1 | 1  | 3 |
| Satyrinae | <i>Cissia proba</i>                  |   | 1  |   |   |   |   | 2 |   |   |    |   |
| Satyrinae | <i>Cissia sp.1</i>                   |   | 1  |   |   |   |   |   |   |   |    |   |
| Satyrinae | <i>Cissia sp.2</i>                   |   | 1  | 1 |   |   |   |   |   |   |    |   |
| Satyrinae | <i>Cissia sp.3</i>                   |   | 1  | 2 |   |   |   | 3 |   |   |    |   |
| Satyrinae | <i>Cissia sp.4</i>                   |   |    |   | 1 |   |   |   |   |   |    |   |
| Satyrinae | <i>Cithaerias phantoma</i>           |   |    |   |   |   |   | 3 |   |   | 2  | 5 |
| Satyrinae | <i>Erichthodes sp.1</i>              | 3 | 3  |   |   |   |   |   |   |   |    |   |
| Satyrinae | <i>Eryphanis automedon automedon</i> |   | 2  |   |   |   |   |   |   |   | 10 |   |

|           |                                        |    |    |   |   |   |   |    |    |   |   |    |    |
|-----------|----------------------------------------|----|----|---|---|---|---|----|----|---|---|----|----|
| Satyrinae | <i>Eryphanis gerhardi</i>              | 1  |    |   |   |   |   |    |    |   |   |    |    |
| Satyrinae | <i>Euptychia mollina</i>               |    |    |   |   |   |   | 2  |    |   |   |    |    |
| Satyrinae | <i>Haetera piera negra</i>             |    |    | 3 |   |   |   | 2  | 1  |   | 3 | 1  |    |
| Satyrinae | <i>Harjesia griseola</i>               | 3  | 7  | 1 |   | 4 | 1 | 2  | 7  |   |   |    | 3  |
| Satyrinae | <i>Harjesia oreba</i>                  |    | 1  |   |   |   |   |    |    |   |   |    |    |
| Satyrinae | <i>Hermeuptychia hermes</i>            | 4  | 34 | 6 | 3 |   |   | 3  | 5  | 2 |   | 3  |    |
| Satyrinae | <i>Magneuptychia fugitiva</i>          |    |    | 2 |   |   |   |    |    |   |   |    | 1  |
| Satyrinae | <i>Magneuptychia libye</i>             | 1  | 1  |   | 1 | 1 |   |    | 3  |   | 1 |    | 3  |
| Satyrinae | <i>Magneuptychia sp.1</i>              |    |    |   |   |   |   | 1  |    |   |   |    |    |
| Satyrinae | <i>Megeuptychia antonoe</i>            | 6  |    |   |   |   |   | 11 | 20 | 3 | 1 |    |    |
| Satyrinae | <i>Morpho achilles achilles</i>        | 4  | 30 | 8 |   |   | 2 | 4  |    | 4 | 1 | 10 | 24 |
| Satyrinae | <i>Morpho deidamia neoptolemus</i>     |    | 4  |   |   |   |   |    | 9  |   |   | 20 | 4  |
| Satyrinae | <i>Morpho menelaus terrestris</i>      |    | 5  | 7 |   |   |   | 1  | 1  |   |   | 5  | 1  |
| Satyrinae | <i>Opoptera aorsa hilaris</i>          |    | 1  |   |   |   |   |    |    |   |   |    |    |
| Satyrinae | <i>Opsiphanes cassiae</i>              | 3  |    |   |   |   |   | 1  | 1  |   | 2 |    | 2  |
| Satyrinae | <i>Opsiphanes invirae</i>              | 20 | 11 |   |   |   |   | 4  | 5  | 1 | 3 | 2  |    |
| Satyrinae | <i>Opsiphanes quiteria</i>             | 5  |    |   |   |   |   |    | 1  |   |   | 2  |    |
| Satyrinae | <i>Paraeuptychia ocirrhoe ocirrhoe</i> | 4  | 2  | 1 |   |   |   |    |    | 2 |   |    | 2  |
| Satyrinae | <i>Pareuptychia sp.1</i>               |    |    |   |   | 1 |   | 1  |    |   |   |    |    |



|                  |                                       |    |    |   |   |   |    |   |   |    |
|------------------|---------------------------------------|----|----|---|---|---|----|---|---|----|
| <b>Satyrinae</b> | <i>Pierella astyoche</i>              | 1  | 3  |   | 4 | 1 | 3  | 3 |   | 7  |
| <b>Satyrinae</b> | <i>Pierella hortonae albofasciata</i> |    | 2  |   |   | 5 |    | 1 |   |    |
| <b>Satyrinae</b> | <i>Pierella hyalinus extincta</i>     |    | 2  |   |   |   | 3  |   |   | 6  |
| <b>Satyrinae</b> | <i>Pierella lamia</i>                 |    |    |   |   |   | 8  | 1 |   | 9  |
| <b>Satyrinae</b> | <i>Pierella lena brasiliensis</i>     | 1  | 7  |   | 2 | 2 | 4  | 7 | 1 | 32 |
| <b>Satyrinae</b> | <i>Posttaygetis penelea</i>           | 2  | 1  |   |   |   | 2  |   |   |    |
| <b>Satyrinae</b> | <i>Pseudodebis marpessa</i>           | 3  | 8  | 1 |   | 4 | 11 | 1 | 2 | 4  |
| <b>Satyrinae</b> | <i>Pseudodebis sp.1</i>               | 1  |    |   |   |   |    |   |   |    |
| <b>Satyrinae</b> | <i>Pseudodebis valentina</i>          | 11 |    |   |   |   |    |   |   |    |
| <b>Satyrinae</b> | <i>Selenophanes cassiope</i>          | 2  |    |   |   |   |    |   |   | 2  |
| <b>Satyrinae</b> | <i>Splendeptychia purusana</i>        |    | 1  |   |   |   |    |   |   |    |
| <b>Satyrinae</b> | <i>Taygetis angulosa</i>              | 1  | 1  |   | 2 |   | 3  |   |   |    |
| <b>Satyrinae</b> | <i>Taygetis cf. uncinata</i>          | 1  |    |   |   | 1 | 2  |   |   |    |
| <b>Satyrinae</b> | <i>Taygetis cleopatra</i>             | 2  |    |   |   |   |    |   |   |    |
| <b>Satyrinae</b> | <i>Taygetis echo echo</i>             | 4  |    |   |   |   | 1  |   |   | 1  |
| <b>Satyrinae</b> | <i>Taygetis kerea</i>                 | 1  |    | 4 | 7 | 1 | 4  | 2 |   | 5  |
| <b>Satyrinae</b> | <i>Taygetis laches laches</i>         | 3  | 35 | 2 | 3 |   | 4  | 6 | 1 | 14 |
| <b>Satyrinae</b> | <i>Taygetis leuctra</i>               | 3  | 10 | 1 |   |   | 1  | 7 | 1 | 2  |
| <b>Satyrinae</b> | <i>Taygetis mermeria</i>              | 1  | 10 |   | 3 |   | 6  |   |   | 18 |

|                  |                                |     |     |     |    |     |    |     |     |    |     |     |     |
|------------------|--------------------------------|-----|-----|-----|----|-----|----|-----|-----|----|-----|-----|-----|
| <b>Satyrinae</b> | <i>Taygetis rufomarginata</i>  | 1   | 15  | 1   |    |     |    |     | 9   |    |     | 31  |     |
| <b>Satyrinae</b> | <i>Taygetis sosis</i>          | 1   | 18  |     | 1  | 2   | 2  | 6   | 13  | 1  |     | 16  | 5   |
| <b>Satyrinae</b> | <i>Taygetis sp.1</i>           | 2   | 1   |     |    |     |    |     |     |    |     |     |     |
| <b>Satyrinae</b> | <i>Taygetis sp.2</i>           |     | 4   |     |    |     |    | 1   | 1   |    |     |     |     |
| <b>Satyrinae</b> | <i>Taygetis thamyra</i>        |     | 32  | 1   |    |     |    | 1   | 3   | 1  |     | 7   | 1   |
| <b>Satyrinae</b> | <i>Taygetis virgilia</i>       | 11  | 29  |     | 10 | 16  | 1  | 2   | 8   | 5  | 19  | 9   | 2   |
| <b>Satyrinae</b> | <i>Taygetomorpha cf. celia</i> | 1   |     |     |    |     |    |     |     |    |     |     |     |
| <b>Satyrinae</b> | <i>Yphthimoides sp.1</i>       | 22  | 28  | 1   |    |     |    |     |     | 3  |     |     |     |
|                  | <b>Total</b>                   | 317 | 557 | 106 | 80 | 123 | 20 | 153 | 350 | 92 | 177 | 366 | 214 |
